# Supplementary material for: Sex-Based Selectivity of PPARγ Regulation in Th1, Th2, and Th17 Differentiation
Source: MDPI journal article supplement (doi:10.3390/ijms17081347), 2016-08-18
Supplement: s1 [file s1]

## Supplementary Materials: Sex-Based Selectivity of PPAR $\gamma$ Regulation in Th1, Th2, and Th17 Differentiation

Hong-Jai Park, Hyeon-Soo Park, Jae-Ung Lee, Alfred L. M. Bothwell and Je-Min Choi

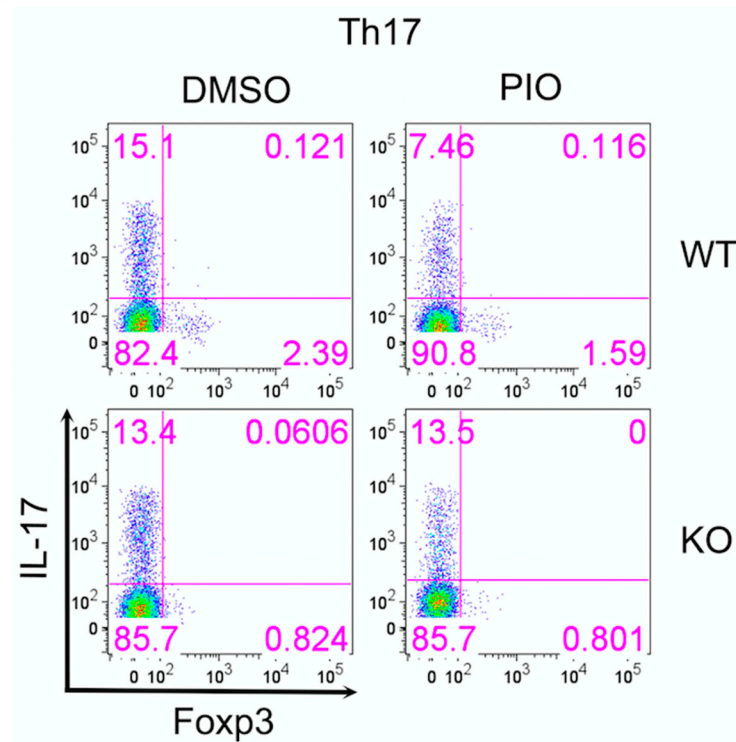

**Figure S1.** Inhibition of Th17 differentiation by pioglitazone treatment is PPAR $\gamma$ -dependent. Naïve T cells from the spleens of CD4-PPAR $\gamma$ <sup>KO</sup> and littermate control wild-type mice were differentiated into Th17 cells in the presence of pioglitazone (20  $\mu$ M) or DMSO. Three days after differentiation, intracellular IL-17 and Foxp3 were evaluated by flow cytometry.
